# Supplementary material for: Chlorate ion mediated rutile to anatase reverse phase transformation in the TiO2 nanosystem
Source: Royal Society of Chemistry journal article supplement (doi:10.1039/c1dt11288k), 2011-01-01
Supplement: c1dt11288k.pdf [file c1dt11288k.pdf]

## Supporting Information

# Chlorate Ion Mediated Rutile to Anatase Reverse Phase Transformation in the TiO<sub>2</sub> Nanosystem

*Reshma Bhosale<sup>\*</sup>, Rajesh Hyam, Dhanya P and Satishchandra Ogale<sup>\*</sup>*

### Supporting Information-I : Experimental

Our experiment involves two electrode assemblies consisting of a Ti foil (Alpha Aesar 99% pure, metal basis, thickness 0.5mm) as anode and a Pt foil as cathode, dipped in 1.4 M perchloric acid (Thomas Baker) in Deionized water. A high voltage of 8V is applied between the two electrodes for six hours. The Rutile nanoneedle powder is found to evolve dynamically from the surface of Ti foil due to a large current density of the order of 50-100 mA/cm<sup>2</sup> on the Ti foil surface, detaching from the surface and settling down in the solution.

The as-grown and annealed samples were characterized by various techniques such as X-ray diffraction (XRD, Philips X'Pert PRO,PAN Analytical diffractometer using Ni-filtered Cu-K $\alpha$  radiation,  $\lambda=1.54\text{\AA}$ ), Micro Raman Spectrometry (Horiba Jobin Yuon), high resolution transmission electron microscopy (HRTEM, FEI, Technai F30, with 300 KV FEG), Ultraviolet-visible spectrometer (Varian, CARY100), Fourier transform infrared spectroscopy (FTIR Perkin Elmer Spectra One).

### Supporting Information-II : Control Experiment of soaked rutile TiO<sub>2</sub>

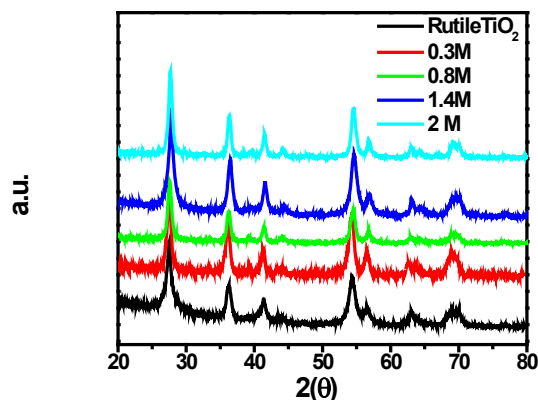

**Fig 1.: XRD patterns of soaked rutile TiO<sub>2</sub> in different acid concentration**

We performed a series of re-soaking experiments on fully washed rutile TiO<sub>2</sub> films in different concentrations (0.3M, 0.8M, 1.4M, 2M) of perchloric acid, followed by annealing at 300°C. We observed that in each case rutile TiO<sub>2</sub> was obtained. This implies that washing leads to irreversible changes in the TiO<sub>2</sub> octahedral conformations, which can not be reversed simply by re-soaking. Thus the phase transformation is strictly due to insitu ClO<sub>4</sub><sup>-</sup> ions incorporated during the anodization process.
